RESEARCH ARTICLE

# Comprehensive assessment of the acute lethal, risk level, and sub-lethal effects of four insecticides on *Trichogramma ostrinae*

Wenya Zhu<sup>1</sup>, Qiongqiong Guo, Mengjiao Chen, Juan Wang, Ye Zhang<sup>1\*</sup>, Ruiyan Ma<sup>1\*</sup>

College of Plant Protection, Shanxi Agricultural University, Taiyuan, China

\* [mary@sxau.edu.cn](mailto:mary@sxau.edu.cn) (RM); [wuduhe@126.com](mailto:wuduhe@126.com) (YZ)

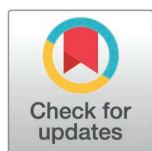

## Abstract

*Trichogramma ostrinae* is one of the most successfully used natural enemies in the integrated management of agroforestry pests. However, the extensive use of insecticides poses a significant threat to the survival and efficacy of *T. ostrinae*. To assess the compatibility of chemical pesticides with *T. ostrinae*, we investigated the acute toxicity, risk level, and sub-lethal effects of four insecticides (chlorfenapyr, emamectin benzoate, phoxim, and lambda-cyhalothrin) on reproduction, parasitism, detoxification enzymes, protective enzyme activities, and active substances under laboratory conditions. The results revealed that phoxim had the highest acute toxicity, with a median lethal concentration value of  $2.8 \times 10^{-7}$  mg/mL, whereas chlorfenapyr had the lowest at  $5.06 \times 10^{-3}$  mg/mL. Emamectin benzoate was classified as high risk, whereas the others were classified as extremely high risk. Insecticide exposure during the larval and pupal stages significantly reduced the emergence of *T. ostrinae* ( $P < 0.05$ ). Lambda-cyhalothrin, emamectin benzoate, and chlorfenapyr extended the time required for prey-handling and reduced parasitism efficiency by 0.70%, 2.45%, and 4.50%. In contrast, phoxim increased the time required for prey-handling and improved parasitism efficiency by 25.37%. All insecticides affected protective enzyme activities, induced detoxification enzyme activity, reactive oxygen species, malondialdehyde and mitochondrial respiratory chain complex I levels, and decreased the adenosine triphosphate level. These findings underscore the differential impacts of insecticides on *T. ostrinae* and emphasize the need for cautious pesticide selection to balance pest control and natural enemy conservation, providing essential scientific guidance for sustainable agroforestry pest management.

## OPEN ACCESS

**Citation:** Zhu W, Guo Q, Chen M, Wang J, Zhang Y, Ma R (2025) Comprehensive assessment of the acute lethal, risk level, and sub-lethal effects of four insecticides on *Trichogramma ostrinae*. PLoS One 20(6): e0325733. <https://doi.org/10.1371/journal.pone.0325733>

**Editor:** Munir Ahmad, PMAS Arid Agriculture University: PMAS-Arid Agriculture University Rawalpindi, PAKISTAN

**Received:** February 18, 2025

**Accepted:** May 16, 2025

**Published:** June 4, 2025

**Copyright:** © 2025 Zhu et al. This is an open access article distributed under the terms of the [Creative Commons Attribution License](https://creativecommons.org/licenses/by/4.0/), which permits unrestricted use, distribution, and reproduction in any medium, provided the original author and source are credited.

**Data availability statement:** All relevant data are within the article and its [Supporting Information](#) files.

**Funding:** This study was supported by Key R&D Program in Shanxi Province (No.:

## Introduction

*Trichogramma ostrinae* (Pang et Chen) (Hymenoptera: Trichogrammatidae) is one of the most successful natural enemies of egg parasitoids and has been bred and released in the field both domestically and internationally [1–3]. As an important

202302140601011), National Key R&D Program of China (No.: 2023YFD1401400), Earmarked Fund for CARS (No.: CARS-28). The funders had no role in study design, data collection and analysis, decision to publish, or preparation of the manuscript.

**Competing interests:** The authors have declared that no competing interests exist.

natural enemy insect resource, *T. ostriniae* is primarily released in large quantities to achieve biological pest control [4], and has achieved significant success in managing agricultural and forestry pests [2,5]. The use of *T. ostriniae* in combating Asian corn borers, *Ostrinia furnacalis* (Guenée) (Lepidoptera: Crambidae), has emerged as a key component of integrated pest management (IPM) strategies for corn pests in China [6]. Owing to its numerous advantages as a biocontrol agent, *T. ostriniae* has attracted increasing attention.

Lambda-cyhalothrin, chlorfenapyr, emamectin benzoate, and phoxim are all used to control Lepidoptera pests [7–9], which is consistent with the goal of *Trichogramma* in controlling pests such as *O. furnacalis*. In IPM, when the pest population is large and it is difficult to effectively control pest damage quickly using biological control methods alone, such as *Trichogramma*, these insecticides can be used as emergency control measures to rapidly reduce the pest population and alleviate damage to crops [10]. Nevertheless, overuse of insecticides can potentially have detrimental effects on both the environment and human health [11,12], and also adversely affect non-target beneficial arthropods, including *Trichogramma* parasitoids [13,14]. Pesticides can have both lethal and sub-lethal effects on natural enemies, leading to mortality and adverse effects on various biological parameters, including developmental duration, adult longevity, morphology, predation ability, reproductive capacity (encompassing oviposition and fertility), movement, information exchange, and parasitic rate [15–17]. Therefore, the adverse effects of pesticides on natural enemies need to be investigated to refine chemical and biological control strategies and ultimately minimize the negative consequences on non-target species [18].

A comprehensive assessment of the lethal and sub-lethal effects of insecticides is imperative to thoroughly evaluate their risks to non-target organisms. We hypothesize that the acute and sub-lethal toxicities of the four insecticides (lambda-cyhalothrin, chlorfenapyr, emamectin benzoate, and phoxim) and their effects on *T. ostriniae* are different. Therefore, we investigated the acute and sub-lethal effects of these insecticides on reproduction, parasitism, and parasitism efficiency. Additionally, the activities of detoxification and protective enzymes were measured, along with the levels of malondialdehyde (MDA), reactive oxygen species (ROS), mitochondrial respiratory chain complex I (MRCC I), and adenosine triphosphate (ATP). This study provides crucial information for understanding the mechanisms associated with the sub-lethal effects of insecticides on *T. ostriniae*, which may aid in the incorporation of insecticides into IPM systems including *T. ostriniae*.

## Materials and methods

### Insects

*T. ostriniae* was collected from the parasitized eggs of *O. furnacalis* in maize fields located in Xinzhou City, Shanxi Province, China (112°44'2.400" E, 38°25'0.120" N). These maize fields are experimental fields owned and managed by our institution. Therefore, no external permits were required for the collection of samples. After hatching, the *T. ostriniae* population was maintained under controlled laboratory conditions at temperatures of 24–26 °C, a relative humidity of 70–80%, and photoperiod

of 15 L: 9 D. *Corcyra cephalonica* (Stainton) eggs were used as hosts for the breeding of *T. ostriniae*. The *C. cephalonica* population was reared in the laboratory for several generations, without pesticide exposure. Subsequently, fresh and clean *C. cephalonica* eggs were collected and subjected to ultraviolet irradiation for 30 min to terminate the embryos. Thereafter, these UV irradiated eggs were placed on 4.0 cm × 2.5 cm card paper that had been treated with white latex to ensure that the eggs did not clump together or overlap. Non-parasitic egg cards were obtained after drying.

### Insecticides and reagents

Emamectin benzoate (96%) and chlorfenapyr (95.7%) were obtained from Qingdao Runsheng Agrochemicals Technology Co., Ltd. (Qingdao, China). Phoxim (90.4%) was obtained from Shandong Bainong Sida Biotechnology Co., Ltd. (Shandong, China), and lambda-cyhalothrin (96%) was acquired from Yangzhou Suling Agrochemicals Technology Co., Ltd. (Yangzhou, China).

Enzyme-linked immunosorbent assay (ELISA) kits for carboxylesterases (CarEs), cytochrome P450 monooxygenases (CYPs), glutathione S-transferases (GSTs), catalase (CAT), superoxide dismutase (SOD), peroxidase (POD), ROS, MDA, MRCC I, and ATP were purchased from Shanghai Meilian Biotechnology Co., Ltd. (Shanghai, China).

### Bioassay

The residual film in the glass tube method was used to determine the acute toxicity of the four insecticides to the *T. ostriniae* population. The concentration range of the insecticides (emamectin benzoate:  $1 \times 10^{-4}$  mg/mL to  $5 \times 10^{-3}$  mg/mL, chlorfenapyr:  $3 \times 10^{-4}$  mg/mL to  $5 \times 10^{-3}$  mg/mL, phoxim:  $6 \times 10^{-8}$  mg/mL to  $2 \times 10^{-6}$  mg/mL, lambda-cyhalothrin:  $7.5 \times 10^{-6}$  mg/mL to  $2 \times 10^{-4}$  mg/mL) were determined by conducting preliminary tests. Each insecticide was serially diluted to five different concentrations using acetone. The test solution (0.5 mL) for each insecticide concentration was then added to a glass test tube (1.5 × 6 cm). The test tubes were subsequently placed in an unheated hot-dog machine (Guangzhou Tiancheng Food Machinery Co., Ltd., Guangzhou, China) that was operated at a constant speed until acetone was completely evaporated. This process ensured that the insecticides were evenly coated on the inner walls of the glass test tubes. The control group was treated with acetone. At 6 h after emergence, *T. ostriniae* adults were transferred into acetone-volatilized test tubes, and a small amount of 10% honey solution was added as a food source for emerging adults. This was done by gently drawing a thin line of the honey solution on the inner wall of the test tube using a sterile dissecting needle. The opening of each treated tube was sealed with a black cloth to permit air exchange, and the tubes were maintained at a temperature of 24–26 °C, relative humidity of 70–80%, and photoperiod of 15 L: 9 D. One hundred *T. ostriniae* adults were exposed to each concentration, with four replicates per treatment. After 8 h, the number of surviving and dead adults was recorded, and the median lethal concentration ( $LC_{50}$ ) was calculated.

### Safety assessment

The  $LR_{50}$  of the insecticides against *T. ostriniae* was assessed under controlled indoor conditions. The safety factor was derived from the 'National Standards of the People's Republic of China, Test guidelines on environmental safety assessment for chemical pesticides, Part 17: *Trichogramma* acute toxicity test (GB/T 31270.17-2014)'. The recommended field application dose of pesticides in China provided by the China Pesticide Information Network was used to calculate the safety factor, using the following formula:

$$\text{Safety factor} = LR_{50} \text{ (g a.i./ha)} / \text{recommended field application concentration (g a.i./ha)},$$

The risks posed by pesticides on natural enemies were assessed using a safety factor. Consequently, the risk levels of pesticides in *T. ostriniae* were categorized into four levels: (1) low risk with a safety factor > 5, (2) medium risk with a safety factor between 5 and 0.5, (3) high risk with a safety factor between 0.5 and 0.05, and (4) extremely high risk with a safety factor of ≤ 0.05.

### Sub-lethal effects of four insecticides on *T. ostrinae* at different developmental stages

*T. ostrinae* adults were removed after 4 h of exposure to an insect-egg ratio of 1:20 and then placed under conditions of temperature of  $25 \pm 1$  °C, relative humidity of  $75 \pm 5\%$ , and a photoperiod of 15 L: 9 D. The developmental stages of *T. ostrinae* were determined by dissecting parasitized *C. cephalonica* eggs for microscopic examination. Parasitized *C. cephalonica* eggs at different developmental stages, such as egg (8 h after incubation), larval (48 h after incubation), pre-pupal (92 h after incubation), and pupal (144 h after incubation) stages, were immersed in the test solution for 5 seconds, then removed, dried, and placed in glass tubes sealed with a black cloth. After emergence, the number of eggs that had been parasitized and the number of eggs from which adults had successfully emerged were counted under a dissecting microscope. Thereafter, the emergence rate was calculated. The acetone treatment was used as the control, and each treatment was replicated four times.

### Effects of four insecticides on parasitism, functional responses, and searching efficiency

The functional response of *T. ostrinae* to *C. cephalonica* eggs was evaluated in glass tubes by exposing *T. ostrinae* to a 50% lethal concentration ( $LC_{50}$ ) of the insecticide. The protocol for treating the parasitoid wasp is the same as described in the bioassay. After 8 h, female *T. ostrinae* adults that survived the treatment with the insecticide were transferred to new glass tubes which were pre-placed with eight *C. cephalonica* egg densities (20, 30, 50, 60, 100, 120, 150, and 200) on the cards with one *T. Ostrinae* in each tube. After 24 h, *T. ostrinae* was removed, and the tubes were sealed with black cloth, maintaining the same conditions until the end of the development process. Each treatment was repeated 20 times. The number of parasitized eggs was recorded after 5 days, with the blackening of *C. cephalonica* eggs being regarded as the criterion for parasitism.

The relationship between the parasitism rate and host density, based on the number of parasitized *C. cephalonica* eggs, was modeled using the least-squares method according to the Holling II model, resulting in the parasitism functional response equation. The functional response disk equation is expressed as  $N_a = aTN / (1 + aT_h N)$ , where  $N_a$  represents the number of parasitized hosts,  $a$  is the instantaneous attack rate,  $N$  is the initial host density,  $T$  is the total available time, and  $T_h$  is the prey-handling time (24 h). The searching efficiency ( $S$ ) was calculated using the formula  $S = a' / (1 + a'T_h N)$ , where  $S$  denotes the searching efficiency,  $a'$  is the rate of successful attacks,  $T_h$  is the prey-handling time, and  $N$  is the prey density [19]. The theoretical maximum parasitism rate is given by  $N_{a_{max}} = 1 / T_h$ . A smaller  $a' / T_h$  indicates a weaker ability of natural enemies to control prey.

### Effects of four insecticides on protective enzyme activity and active substance content

Adult *T. ostrinae* specimens that survived 8 h after treatment with the  $LC_{50}$  concentrations of insecticides were selected for protective enzyme activity and active substance content analyses. Surviving *T. ostrinae* adults were frozen and pulverized using liquid nitrogen. A 10% homogenate was created by adding a nine-fold volume of saline solution. The supernatant was collected by centrifugation at 2000 rpm for 15 min at 4 °C. The levels of POD, SOD, CAT, GST, CarE, CYP, ROS, MDA, ATP, and MRCC I were measured using ELISA kits (AndyGene). This procedure was conducted in triplicate.

### Statistical analysis

All data were analyzed using SPSS software (version 16.0; SPSS Inc., Chicago, IL, USA) and plotted using the Origin software. The normality of all data was first checked before analysis and data that followed a normal distribution were presented as mean  $\pm$  standard error (SE,  $n=3$ ). The homogeneity of variances was evaluated through the application of Levene's test. One way analysis of variance was performed with Tukey test (homogeneity of variance) and Dunnett T3 (nonheterogeneity of variance) post hoc tests to examine the differences on acute toxicity, enzyme activities MDA, ROS, MRCC I and ATP levels. Statistical significance was set at  $P < 0.05$ .

## Results

### Acute toxicity and safety factors of four insecticides in *T. ostrinae* population

The results revealed that phoxim demonstrated the highest acute toxicity toward *T. ostrinae*, with an  $LC_{50}$  value of  $2.8 \times 10^{-7}$  mg/mL. Conversely, chlorfenapyr exhibited the lowest acute toxicity, with an  $LC_{50}$  value of  $5.06 \times 10^{-3}$  mg/mL (Table 1). The safety factor for emamectin benzoate was  $9 \times 10^{-2}$ , while those for chlorfenapyr, phoxim, and lambda-cyhalothrin were  $1.87 \times 10^{-2}$ ,  $3.7 \times 10^{-7}$ , and  $6 \times 10^{-3}$ , respectively (Table 2). According to GB/T 31270.17–2014, emamectin benzoate is classified as a high-risk insecticide, whereas chlorfenapyr, lambda-cyhalothrin, and phoxim are classified as extremely high-risk insecticides (Table 2).

### Toxicity of four insecticides against *T. ostrinae* at different developmental stages

During the egg stage, the emergence rate of *T. ostrinae* post-treatment with chlorfenapyr, emamectin benzoate, and phoxim was significantly decreased compared with the control ( $P < 0.05$ ), while Lambda cyhalothrin did not significantly affect the emergence rate ( $P > 0.05$ ) (Fig 1A). A significant decrease in the emergence rate was observed in all four insecticides relative to the control group when they were applied at the larval stage ( $P < 0.05$ , Fig 1B). When applied at the pre-pupal stage, the emergence rate of *T. ostrinae* was significantly reduced by emamectin benzoate and chlorfenapyr, but not by phoxim and lambda-cyhalothrin (Fig 1C). Moreover, all four insecticides significantly decreased the emergence rate when were applied at the pupal stage ( $P < 0.05$ , Fig 1D).

### Effects of four insecticides on functional response and searching efficiency of *T. ostrinae*

The Holling II equation was used to model the parasitism rate of *T. ostrinae* at various *C. cephalonica* egg densities. Compared to the control group, the prey-handling time for *C. cephalonica* eggs by *T. ostrinae* was extended by lambda-cyhalothrin, emamectin benzoate, and chlorfenapyr, whereas it was shortened by phoxim. Relative to the control group, the parasitism efficiency of *T. ostrinae* decreased by 0.70%, 2.45%, and 4.50%, and the maximum parasitism number decreased by 10%, 18.65%, and 22.44%, when treated with lambda-cyhalothrin, emamectin benzoate, and chlorfenapyr, respectively. Conversely, phoxim treatment led to a 25.37% increase in parasitism efficiency and an 8.81% increase in maximum parasitism number (Table 3).

Searching efficiency, a critical behavioral trait of natural enemies, was found to be inversely related to the density of *C. cephalonica* eggs. As egg density increased, the search efficiency of *T. ostrinae* decreased. Among the four insecticides tested, phoxim had the most pronounced effect on the searching efficiency (Fig 2).

**Table 1. Acute toxicity of insecticides in adult *T. ostrinae*.**

| Insecticides       | $LC_{50}$ /(mg/ml)    | Toxicity regression equation | Confidence interval of 95%                     | $\chi^2$ | P    |
|--------------------|-----------------------|------------------------------|------------------------------------------------|----------|------|
| Emamectin benzoate | $2.44 \times 10^{-4}$ | $Y = 3.757 + 1.045X$         | $1.18 \times 10^{-3} \sim 3.52 \times 10^{-4}$ | 2.16     | 0.97 |
| Chlorfenapyr       | $5.06 \times 10^{-3}$ | $Y = 0.419 + 0.183X$         | $0.07 \times 10^{-3} \sim 2.9 \times 10^{-2}$  | 1.21     | 0.84 |
| Phoxim             | $2.80 \times 10^{-7}$ | $Y = 11.40 + 1.742X$         | $1.58 \times 10^{-7} \sim 9.67 \times 10^{-8}$ | 5.87     | 0.71 |
| Lambda cyhalothrin | $1.80 \times 10^{-5}$ | $Y = 4.640 + 0.977X$         | $1 \times 10^{-5} \sim 2.7 \times 10^{-5}$     | 4.67     | 0.90 |

<https://doi.org/10.1371/journal.pone.0325733.t001>

**Table 2. Safety evaluation of insecticides in adult *T. ostrinae*.**

| Insecticides       | Safety factor         | Safety grade        |
|--------------------|-----------------------|---------------------|
| Emamectin benzoate | $9 \times 10^{-2}$    | High risk           |
| Chlorfenapyr       | $1.87 \times 10^{-2}$ | Extremely high risk |
| Phoxim             | $3.7 \times 10^{-7}$  | Extremely high risk |
| Lambda cyhalothrin | $6 \times 10^{-3}$    | Extremely high risk |

<https://doi.org/10.1371/journal.pone.0325733.t002>



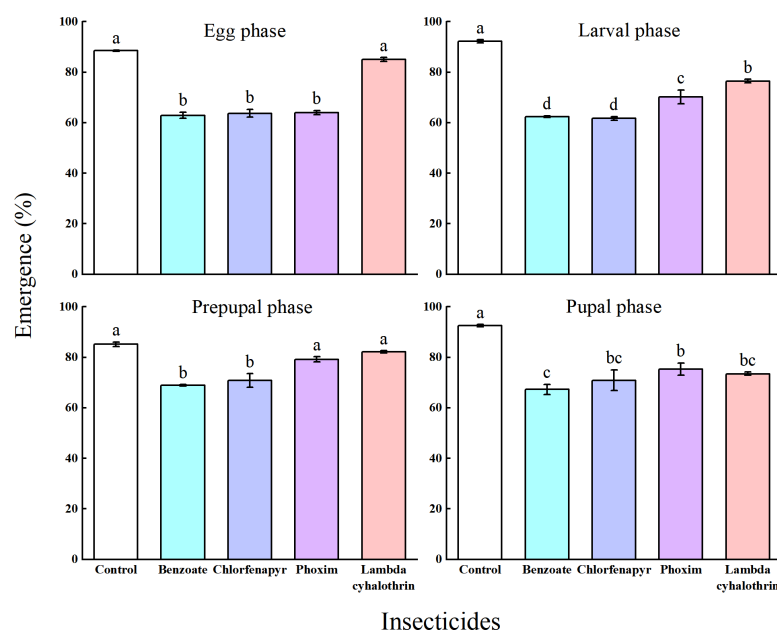

**Fig 1. Emergence rates of *T. ostrinia* population exposed to insecticides at the egg (A), larval (B), pre-pupal (C), and pupal (D) stages.** Data are expressed as mean  $\pm$  standard error. Groups denoted by different letters represent significant differences ( $P < 0.05$ ), whereas those denoted by the same letters indicate non – significant differences.

<https://doi.org/10.1371/journal.pone.0325733.g001>

**Table 3. Effects of insecticides on functional response of *T. ostrinia*.**

| Insecticides       | Disc equation of functional response ( $N_a$ ) | $R^2$ | Instantaneous attack rate ( $a$ ) | Prey handling time ( $T_h$ ) | Parasitic efficiency ( $a/T_h$ ) | Maximum parasitizing capacity ( $N_a \text{ max}$ ) |
|--------------------|------------------------------------------------|-------|-----------------------------------|------------------------------|----------------------------------|-----------------------------------------------------|
| Control            | $1.0569N/(1 + 0.0185N)$                        | 0.843 | 1.0569                            | 0.01748                      | 60.46                            | 57.21                                               |
| Emamectin benzoate | $1.2652N/(1 + 0.0275N)$                        | 0.768 | 1.2675                            | 0.02724                      | 58.98                            | 46.54                                               |
| Chlorfenapyr       | $1.3014N/(1 + 0.0293N)$                        | 0.874 | 1.3014                            | 0.02254                      | 57.74                            | 44.37                                               |
| Phoxim             | $1.1796N/(1 + 0.0175N)$                        | 0.903 | 1.2175                            | 0.01606                      | 75.80                            | 62.25                                               |
| Lambda cyhalothrin | $1.1702N/(1 + 0.0228N)$                        | 0.865 | 1.1702                            | 0.01949                      | 60.03                            | 51.30                                               |

<https://doi.org/10.1371/journal.pone.0325733.t003>

### Effects of four insecticides on protective enzyme activity of *T. ostrinia*

Significantly elevated SOD activity was observed in the treatment group compared to the control group following emamectin benzoate treatment ( $P < 0.05$ ; Fig 3). All four insecticides induced POD activity in the following order: lambda-cyhalothrin, phoxim, chlorfenapyr, and emamectin benzoate. Phoxim significantly inhibited CAT activity in *T. ostrinia*, whereas lambda-cyhalothrin significantly induced CAT activity compared with that in the control group ( $P < 0.05$ ; Fig 3). However, emamectin benzoate and chlorfenapyr had no significant effect on CAT activity ( $P > 0.05$ ; Fig 3).

### Effects of four insecticides on detoxification enzyme activities of *T. ostrinia*

Relative to the control group, the activities of CarEs, GSTs, and CYP450 in *T. ostrinia* were significantly increased following treatment with phoxim, chlorfenapyr, and emamectin benzoate ( $P < 0.05$ ; Fig 4). Similarly, the activities of CarE and CYP in *T. ostrinia* significantly increased after treatment with lambda-cyhalothrin relative to those in the control group ( $P < 0.05$ ; Fig 4). Notably, GST activity in the emamectin benzoate treatment group was the highest among all groups. Furthermore, GST activity in the emamectin benzoate group increased 2.71-fold relative to that in the control group (Fig 4).

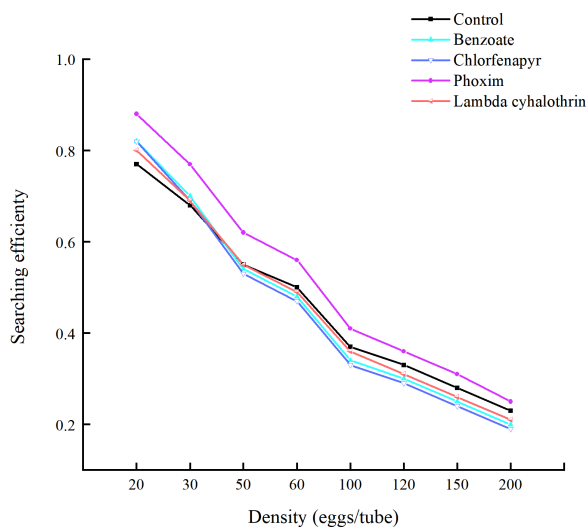

**Fig 2. Sublethal effects of the four insecticides on the searching efficiency of *T. ostriniae*.**

<https://doi.org/10.1371/journal.pone.0325733.g002>

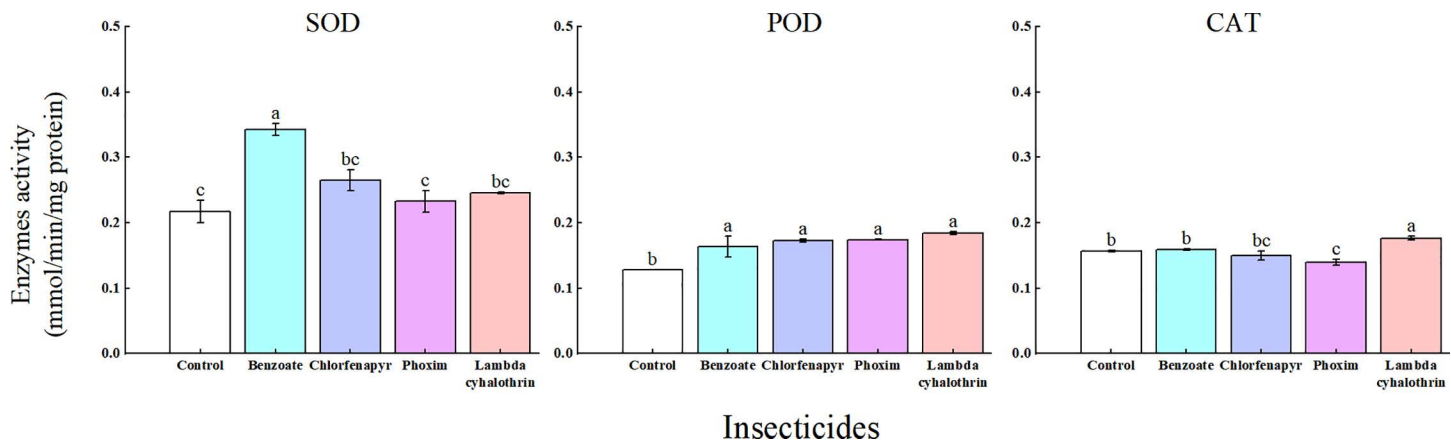

**Fig 3. Sub-lethal concentration effects of the four insecticides on SOD, POD, and CAT activity in adult *T. ostriniae*.** Data are expressed as mean  $\pm$  standard error, and multiple comparisons among groups were performed using Tukey test. Groups denoted by different letters represent significant differences ( $P < 0.05$ ), whereas those denoted by the same letters indicate non-significant differences ( $P > 0.05$ ). SOD, superoxide dismutase; POD, peroxidase; CAT, catalase.

<https://doi.org/10.1371/journal.pone.0325733.g003>

### Effects of four insecticides on the MDA and ROS levels in *T. ostriniae*

Following treatment with the four insecticides, the ROS level in the emamectin benzoate- and chlorfenapyr-treated groups was significantly higher than that in the control group ( $P < 0.05$ ; Fig 5). The MDA level in the chlorfenapyr treatment group increased significantly, exhibiting a 1.39-fold increase compared with that in the control group ( $P < 0.05$ ; Fig 5). The emamectin benzoate-treated group exhibited the highest ROS level (Fig 5). These findings suggest that chlorfenapyr induces the accumulation of ROS and MDA, leading to subsequent damage to *T. ostriniae* growth and development.

### Effects of four insecticides on the MRCC I and ATP levels in *T. ostriniae*

Treatment with the four insecticides resulted in a significant increase in MRCC I content in the chlorfenapyr and phoxim groups relative to those in the control group ( $P < 0.05$ ; Fig 6). Specifically, the MRCC I levels were 4.08 and 1.64 times

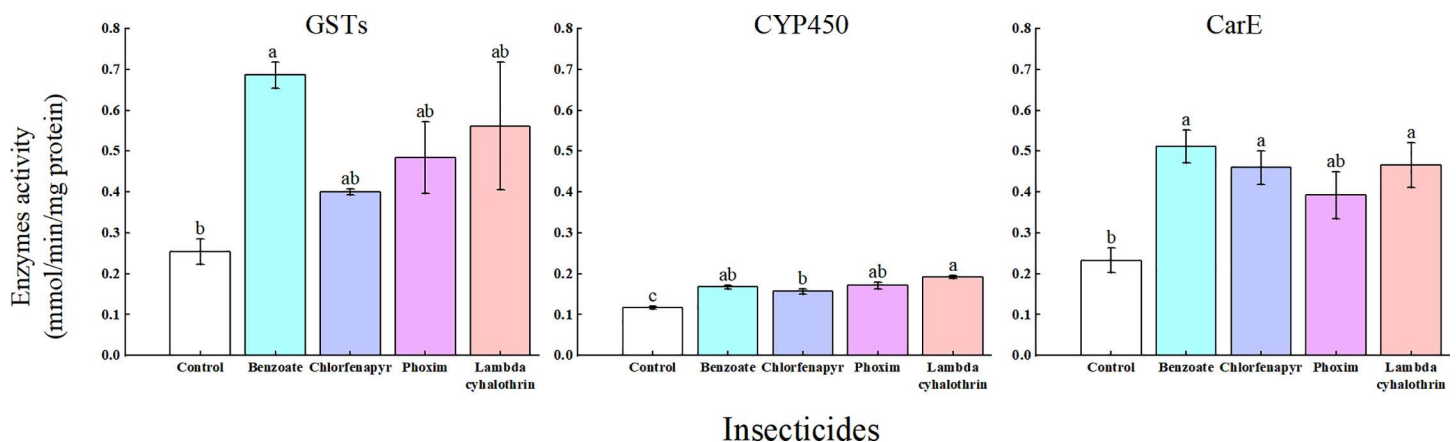

**Fig 4. Sub-lethal concentration effects of the four insecticides on GST, CYP, and CarE activity in *T. ostriniae* population.** Data are expressed as mean  $\pm$  standard error and multiple comparisons among groups were performed using the Tukey test. Groups denoted by different letters represent significant differences ( $P < 0.05$ ), whereas those denoted by the same letters indicate non – significant differences ( $P > 0.05$ ). GST, glutathione-S-transferase; CYP, cytochrome P450; CarE, carboxylesterase.

<https://doi.org/10.1371/journal.pone.0325733.g004>

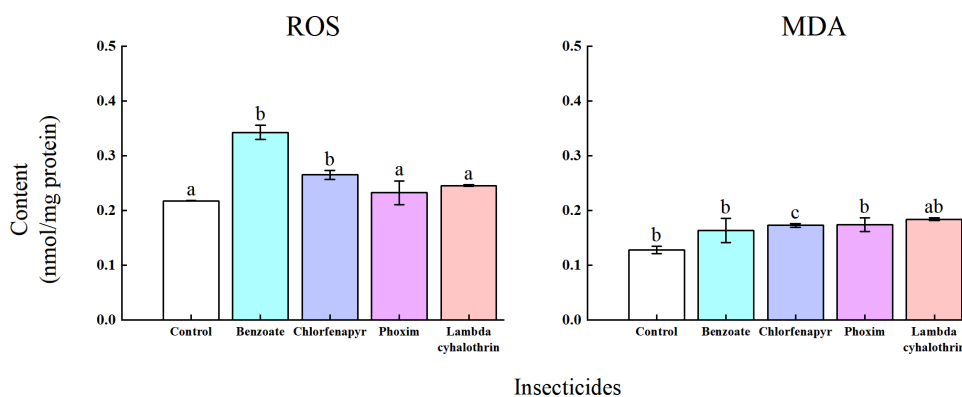

**Fig 5. Sub-lethal concentration effects of the four insecticides on MDA and ROS content in adult *T. ostriniae*.** Data are expressed as mean  $\pm$  error and multiple comparisons among groups were performed using the Tukey test. Groups denoted by different letters represent significant differences ( $P < 0.05$ ), whereas those denoted by the same letters indicate non – significant differences ( $P > 0.05$ ). MDA, malondialdehyde; ROS, reactive oxygen species.

<https://doi.org/10.1371/journal.pone.0325733.g005>

higher in the chlorfenapyr and phoxim groups, respectively, than in the control group. Additionally, the ATP levels in *T. ostriniae* were significantly reduced following treatment with lambda-cyhalothrin, chlorfenapyr, and emamectin benzoate relative to that in the control group ( $P < 0.05$ ; Fig 6). The emamectin benzoate-treated group had the lowest ATP level (Fig 6).

## Discussion

Pesticides are widely used in agricultural ecosystems and can significantly affect the effectiveness of biological control agents. This is primarily due to the direct mortality of exposed arthropods and various sub-lethal physiological and behavioral effects [15]. Sub-lethal concentrations of insecticides can induce changes in beneficial insects, including alterations in weight, morphology, longevity, development duration, and fecundity, as well as shifts in population dynamics [20]. Our study assessed the acute lethal and sub-lethal effects of phoxim, lambda-cyhalothrin, emamectin benzoate, and



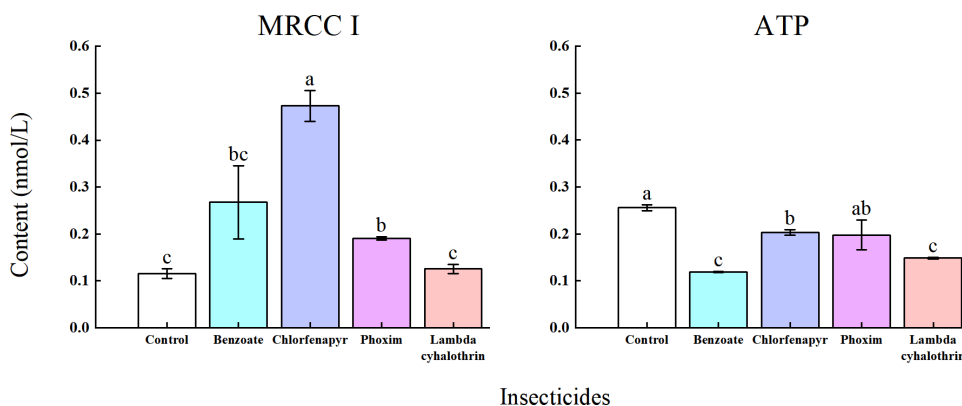

**Fig 6. Sub-lethal concentration effects of four insecticides on MRCC I and ATP content in adult *T. ostriniae*.** Data are expressed as mean  $\pm$  error and multiple comparisons among groups were performed using the Tukey test. Groups denoted by different letters represent significant differences ( $P < 0.05$ ), whereas those denoted by the same letters indicate non-significant differences ( $P > 0.05$ ). MRCC I, mitochondrial respiratory chain complex I; ATP, adenosine triphosphate.

<https://doi.org/10.1371/journal.pone.0325733.g006>

chlorfenapyr and indicated that the four insecticides exhibited lethal toxicity in *T. ostriniae*. Emamectin benzoate is classified as a high-risk insecticide, whereas chlorfenapyr, phoxim, and lambda-cyhalothrin are considered to be extremely high-risk insecticides.

Our study demonstrated a significant reduction in the emergence rate following the application of the four insecticides at the larval and pupal stages, relative to the control group. Additionally, a significant reduction in the emergence rate was observed in the emamectin benzoate and chlorfenapyr groups at the egg, larval, pre-pupal, and pupal stages compared with the control group. These results are consistent with those of previous studies. Numerous studies have shown that different insecticides can reduce the emergence rates of egg parasitoids. For example, Costa *et al.* discovered that the application of various insecticides, including lambda-cyhalothrin + thiamethoxam, triflumuron, spinosad, fipronil, and thiamethoxam, led to a significant reduction in the emergence of *Trichogramma galloi* Zucchi, with the most pronounced effect observed when these were applied during the pupal stage [21]. Similarly, Souza *et al.* found that chlorpyrifos, beta-cypermethrin, spinosad, and chlorfenapyr diminished the emergence success of F1 *Trichogramma pretiosum* Riley [22]. Insects treated with etofenprox and alpha-cypermethrin/teflubenzuron during the egg-larval period and lambda-cyhalothrin/thiamethoxam during the pupal stage also experienced reduced emergence [22]. Furthermore, Moura *et al.* observed no adult emergence when insecticides were applied at the *T. pretiosum* pupal stage [23]. Organophosphates, such as chlorpyrifos-methyl, which are known for their high toxicity and ability to penetrate the insect cuticle, can easily contact the developed pupae beneath the eggshell [24]. Takada *et al.* (2001) and Turchen *et al.* (2016) found that insecticide residues on the host eggshell can inhibit adult emergence of *Trichogramma parasitoids* Westwood even when applied one day prior to emergence [25,26]. Therefore, selecting lesser toxic pesticides that are compatible with *Trichogramma* field releases is crucial for IPM programs that target lepidopteran crop pests.

Pesticides have been reported to negatively affect the reproductive performance of *Trichogramma* spp.; previous studies have indicated that insecticides, including pyrethroids, neonicotinoids, and organophosphates, can markedly diminish the fecundity of natural insect enemies, as evidenced by decreased oviposition and impaired discrimination of host eggs [27,28]. In the present study, the four insecticides markedly affected the fecundity of *T. ostriniae*. Specifically, lambda-cyhalothrin, emamectin benzoate, and chlorfenapyr exhibited a significant decrease in parasitism efficiency and maximum parasitism number of *C. cephalonica* eggs, whereas phoxim significantly enhanced both parameters.

Additionally, we found that the prey-handling time for *C. cephalonica* eggs by *T. ostriniae* was extended by lambda-cyhalothrin, emamectin benzoate, and chlorfenapyr; however, it was shortened by phoxim. This finding aligns with that of

previous studies. For instance, Ray *et al.* (2023) reported that exposure of *T. chilonis* to imidacloprid resulted in a reduction in handling time and an increase in searching efficiency, per capita parasitization efficiency, and parasitization rate per handling time across multiple generations (F1–F5) when various densities of *C. cephalonica* eggs were used [29]. Similarly, Zhang *et al.* found that sub-lethal concentrations of azoxystrobin significantly reduced the predicted predation size, predation rate, and searching efficiency [30]. In this study, we observed that the searching efficiency of *T. ostriniae* on *C. cephalonica* eggs decreased with increasing egg density, eventually approaching control levels. This finding aligns with the effect of sub-lethal doses of imidacloprid on the predatory capacity of *Hippodamia variegata* Goeze [31]. These findings suggest intraspecific competition and mutual interference between *T. ostriniae*. Therefore, when applying *T. ostriniae* for pest control in the field, it is crucial to release it in a manner that considers species and host density to achieve optimal pest control efficacy while minimizing costs.

Although chemical control continues to be an effective pest management strategy, widespread and intensive use of insecticides has resulted in resistance to various major classes of insecticides in numerous field pest populations [32]. The emergence of insecticide resistance may be attributed to enhanced metabolic detoxification mediated by enzymes, including CYP450, GSTs, and CarEs [33,34]. CAT, SOD, and POD are essential protective enzymes in insects that are crucial for balancing free radicals and preventing free radical-induced toxicity [35]. Exposure to pollutants can lead to changes in the activity of these protective enzymes, which indicate the level of oxidative stress and serve as a marker of alterations in the physiological state of an organism [36]. Insecticides can either stimulate or suppress the insect protective enzyme system to various extents [37,38]. Previous studies have shown that increased CarE levels are associated with resistance to organophosphates and carbamates in *Schizaphis graminum* Rondani [39] and *Rhopalosiphum padi* Linnaeus [40]. Additionally, the enzymatic activities of CarE and GST in *Tetranychus urticae* Koch significantly increased 12 h after exposure to sub-lethal concentrations of abamectin (LC<sub>10</sub> and LC<sub>25</sub>) [41]. Protective enzyme activity is a vital biomarker for the sub-lethal effects of insecticides. Previous research has found that exposure to an LC<sub>25</sub> dose of emamectin benzoate, lambda-cyhalothrin, imidacloprid, or indoxacarb leads to a decline in these enzyme activities during the larval stage and subsequent development of *Chilo suppressalis* [42]. Consistent with previous research, our study found that, following treatment with emamectin benzoate, SOD and POD activities were elevated relative to those in the control group. Furthermore, the activities of CarEs, GSTs, and CYPs in *T. ostriniae* significantly increased following treatment with phoxim, chlorfenapyr, and emamectin benzoate compared with the control group.

Herbicides and insecticides also enhance ROS production in insects [43]. ROS are detrimental to biological systems because of their ability to oxidize lipids and damage proteins and DNA [44]. ROS-initiated lipid peroxidation results in the formation of MDA. Excessive MDA build-up can lead to structural alterations in intestinal cells, mitochondrial dysfunction, decreased bioenergetics, and oxidative stress [45]. MRCC I is a key site for ROS generation and is instrumental in driving ATP synthesis [46]. ATP is a vital high-energy phosphate molecule in living cells that supplies energy necessary for various cellular functions. Decreased ATP levels can result in reduced biological activity [47]. A previous study demonstrated that sub-lethal doses of tolfenpyrad can diminish the MRCC I level in *C. sinica* larvae, disrupting the balance between ROS production and elimination, thereby causing cellular damage [48]. Zhang *et al.* reported an increase in MDA and ROS content in *Chrysoperla sinica* Tjeder larvae after exposure to sub-lethal doses of tolfenpyrad, with continuous accumulation in the larvae [48]. In this study, we observed a significant increase in ROS levels in the emamectin benzoate- and chlorfenapyr-treated groups, whereas MDA levels were significantly increased in the chlorfenapyr-treated group. The MRCC I content of *T. ostriniae* increased considerably in the chlorfenapyr- and phoxim-treated groups. Additionally, the ATP level of *T. ostriniae* was significantly reduced after treatment with lambda-cyhalothrin, chlorfenapyr, and emamectin benzoate.

However, we only investigated the effects of these four insecticides on the biological traits of *T. ostriniae* under laboratory conditions. Further semi-field and field studies are required to fully understand their compatibility with the *Trichogramma* species.

## Conclusion

The four insecticides exhibited lethal toxicity to *T. ostriniae*. Emamectin benzoate was classified as a high-risk insecticide, whereas chlorfenapyr, phoxim, and lambda-cyhalothrin were considered as extremely high risk. To the best of our knowledge, this study is the first to reveal the effects of these four insecticides on reproduction, parasitism ability, detoxification enzymes, protective enzymes, and active substances in *T. ostriniae*. The integration of these insecticides into IPM strategies should be planned meticulously.

## Supporting information

**S1 Data. The minimal data set.**  
(XLSX)

## Author contributions

**Conceptualization:** Wenya Zhu, Ruiyan Ma.

**Funding acquisition:** Ruiyan Ma.

**Investigation:** Ye Zhang.

**Methodology:** Ye Zhang.

**Software:** Qiongqiong Guo.

**Writing – original draft:** Wenya Zhu, Ruiyan Ma.

**Writing – review & editing:** Wenya Zhu, MengJiao Chen, Juan Wang.

## References

1. Tai H, Zhang F, Xiao C, Tang R, Liu Z, Bai S, et al. Toxicity of chemical pesticides commonly used in maize to *Trichogramma ostriniae* (Hymenoptera: Trichogrammatidae), an egg parasitoid of Asian corn borer. *Ecotoxicol Environ Saf*. 2022;241:113802. <https://doi.org/10.1016/j.ecoenv.2022.113802> PMID: 35772363
2. Wang Y, Hou Y-Y, Benelli G, Desneux N, Ali A, Zang L-S. *Trichogramma ostriniae* Is More Effective Than *Trichogramma dendrolimi* As a Biocontrol Agent of the Asian Corn Borer, *Ostrinia furnacalis*. *Insects*. 2022;13(1):70. <https://doi.org/10.3390/insects13010070> PMID: 35055913
3. Masry SHD, El-Wakeil N. Egg Parasitoid Production and Their Role in Controlling Insect Pests. Cottage Industry of Biocontrol Agents and Their Applications. Springer International Publishing. 2019;3–47. [https://doi.org/10.1007/978-3-030-33161-0\\_1](https://doi.org/10.1007/978-3-030-33161-0_1)
4. Wang Z-Y, He K-L, Zhang F, Lu X, Babendreier D. Mass rearing and release of *Trichogramma* for biological control of insect pests of corn in China. *Biological Control*. 2014;68:136–44. <https://doi.org/10.1016/j.biocontrol.2013.06.015>
5. Myint YY, Bai S, Zhang T, Babendreier D, He K, Wang Z. Selection of the Most Effective *Trichogramma* Strains (Hymenoptera: Trichogrammatidae) From Myanmar to Control Asian Corn Borer, *Ostrinia furnacalis* (Lepidoptera: Crambidae). *J Econ Entomol*. 2022;115(1):81–92. <https://doi.org/10.1093/jee/toab241> PMID: 34908154
6. Wang Z, He K, Zhao J, Zhou D. Integrated pest management in China. In: Maredia KM, Dakouo D, Mota-Sanchez D. Integrated pest management in the global arena. CABI Publishing. 2003;197–207. <https://doi.org/10.1079/9780851996523.01>
7. El Sherif DF, Soliman NH, Alshallash KS, Ahmed N, Ibrahim MAR, A Al-Shammery K, et al. The Binary Mixtures of Lambda-Cyhalothrin, Chlorfenapyr, and Abamectin, against the House Fly Larvae, *Musca domestica* L. *Molecules*. 2022;27(10):3084. <https://doi.org/10.3390/molecules27103084> PMID: 35630573
8. Depalo L, Pasqualini E, Jan E, Slater R, Daum E, Zimmer CT, et al. Evaluation of the susceptibility to emamectin benzoate and lambda cyhalothrin in European populations of *Cydia pomonella* (L.) (Lepidoptera: Tortricidae). *Crop Protection*. 2022;157:105968. <https://doi.org/10.1016/j.cropro.2022.105968>
9. Mao K-K, Li H-R, Zhu J-Y, Jin M-H, Wang P, Peng Y, et al. Rapid test to detect insecticide resistance in field populations of *Spodoptera frugiperda* (Lepidoptera: Noctuidae). *Front Physiol*. 2023;14:1254765. <https://doi.org/10.3389/fphys.2023.1254765> PMID: 37680771
10. Torres JB, Bueno A de F. Conservation biological control using selective insecticides – A valuable tool for IPM. *Biological Control*. 2018;126:53–64. <https://doi.org/10.1016/j.biocontrol.2018.07.012>
11. Wan N-F, Dainese M, Wang Y-Q, Loreau M. Cascading social-ecological benefits of biodiversity for agriculture. *Curr Biol*. 2024;34(12):R587–603. <https://doi.org/10.1016/j.cub.2024.05.001> PMID: 38889684

12. Wan N-F, Cai Y-M, Shen Y-J, Ji X-Y, Wu X-W, Zheng X-R, et al. Increasing plant diversity with border crops reduces insecticide use and increases crop yield in urban agriculture. *Elife*. 2018;7:e35103. <https://doi.org/10.7554/eLife.35103> PMID: 29792597
13. Serrão JE, Plata-Rueda A, Martínez LC, Zanutto JC. Side-effects of pesticides on non-target insects in agriculture: a mini-review. *Naturwissenschaften*. 2022;109(2):17. <https://doi.org/10.1007/s00114-022-01788-8> PMID: 35138481
14. Wan N-F, Fu L, Dainese M, Kiær LP, Hu Y-Q, Xin F, et al. Pesticides have negative effects on non-target organisms. *Nat Commun*. 2025;16(1):1360. <https://doi.org/10.1038/s41467-025-56732-x> PMID: 39948065
15. Desneux N, Decourtye A, Delpuech J-M. The sublethal effects of pesticides on beneficial arthropods. *Annu Rev Entomol*. 2007;52:81–106. <https://doi.org/10.1146/annurev.ento.52.110405.091440> PMID: 16842032
16. Jiang J, Liu X, Zhang Z, Liu F, Mu W. Lethal and sublethal impact of sulfoxaflor on three species of *Trichogramma* parasitoid wasps (Hymenoptera: Trichogrammatidae). *Biological Control*. 2019;134:32–7. <https://doi.org/10.1016/j.biocontrol.2019.04.001>
17. Xu C, Ding J, Zhao Y, Luo J, Mu W, Zhang Z. Cyantraniliprole at Sublethal Dosages Negatively Affects the Development, Reproduction, and Nutrient Utilization of *Ostrinia furnacalis* (Lepidoptera: Crambidae). *J Econ Entomol*. 2017;110(1):230–8. <https://doi.org/10.1093/jee/tow248> PMID: 28011688
18. Ahmad M, Kamran M, Abbas MN, Shad SA. Ecotoxicological risk assessment of combined insecticidal and thermal stresses on *Trichogramma chilonis*. *J Pest Sci*. 2023;97(2):921–31. <https://doi.org/10.1007/s10340-023-01686-6>
19. Holling CS. The Components of Predation as Revealed by a Study of Small-Mammal Predation of the European Pine Sawfly. *Can Entomol*. 1959;91(5):293–320. <https://doi.org/10.4039/ent91293-5>
20. Bartling M-T, Brandt A, Hollert H, Vilcinskis A. Current Insights into Sublethal Effects of Pesticides on Insects. *Int J Mol Sci*. 2024;25(11):6007. <https://doi.org/10.3390/ijms25116007> PMID: 38892195
21. Costa MA, Moscardini VF, da Costa Gontijo P, Carvalho GA, de Oliveira RL, de Oliveira HN. Sublethal and transgenerational effects of insecticides in developing *Trichogramma galloi* (Hymenoptera: Trichogrammatidae) : toxicity of insecticides to *Trichogramma galloi*. *Ecotoxicology*. 2014;23(8):1399–408. <https://doi.org/10.1007/s10646-014-1282-y> PMID: 25011923
22. Souza JR, Carvalho GA, Moura AP, Couto MHG, Maia JB. Toxicity of some insecticides used in maize crop on *Trichogramma pretiosum* (Hymenoptera, Trichogrammatidae) immature stages. *Chilean J Agric Res*. 2014;74(2):234–9. <https://doi.org/10.4067/s0718-58392014000200016>
23. Moura AP, Carvalho GA, Pereira AE, Rocha LCD. Selectivity evaluation of insecticides used to control tomato pests to *Trichogramma pretiosum*. *BioControl*. 2006;51(6):769–78. <https://doi.org/10.1007/s10526-006-0001-x>
24. Resh VH, Cardé RT. *Encyclopedia of insects*: Academic press; 2009. <https://doi.org/10.1016/B978-0-12-374144-8.X0001-X>
25. Takada Y, Kawamura S, Tanaka T. Effects of various insecticides on the development of the egg parasitoid *Trichogramma dendrolimi* (Hymenoptera: Trichogrammatidae). *J Econ Entomol*. 2001;94(6):1340–3. <https://doi.org/10.1603/0022-0493-94.6.1340> PMID: 11777034
26. Turchen LM, Golin V, Butnariu AR, Guedes RNC, Pereira MJB. Lethal and Sublethal Effects of Insecticides on the Egg Parasitoid *Telenomus podisi* (Hymenoptera: Platygastridae). *J Econ Entomol*. 2016;109(1):84–92. <https://doi.org/10.1093/jee/tov273> PMID: 26352754
27. Wang D, Lü L, He Y, Shi Q, Wang G. Effects of Insecticides on Oviposition and Host Discrimination Behavior in *Trichogramma chilonis* (Hymenoptera: Trichogrammatidae). *J Econ Entomol*. 2016;109(6):2380–7. <https://doi.org/10.1093/jee/tow220> PMID: 27986938
28. Fernandes MES, Alves FM, Pereira RC, Aquino LA, Fernandes FL, Zanutto JC. Lethal and sublethal effects of seven insecticides on three beneficial insects in laboratory assays and field trials. *Chemosphere*. 2016;156:45–55. <https://doi.org/10.1016/j.chemosphere.2016.04.115> PMID: 27160634
29. Ray A, Gadratagi BG, Budhlakoti N, Rana DK, Adak T, Govindharaj GPP, et al. Functional response of an egg parasitoid, *Trichogramma chilonis* Ishii to sublethal imidacloprid exposure. *Pest Manag Sci*. 2023;79(10):3656–65. <https://doi.org/10.1002/ps.7540> PMID: 37178406
30. Zhang C-X, Wang Z-J, Li J-J, Wang N-M, Xue C-B. Sublethal effects of toltenpyrad on the development, reproduction, and predatory ability of *Chrysoperla sinica*. *Ecotoxicol Environ Saf*. 2022;236:113482. <https://doi.org/10.1016/j.ecoenv.2022.113482> PMID: 35367884
31. Yang Q, Chen W, Sun X. Response of the functional of *Hippodamia variegata* preying on pea aphid *Acyrtosiphon pisum* to sublethal doses of 3 insecticides. *Pratacultural Science*. 2016;33(7):1418–25. <https://doi.org/10.11829/j.issn.1001-0629.2015-0559>
32. Desneux N, Han P, Mansour R, Arnó J, Brévault T, Campos MR, et al. Integrated pest management of *Tuta absoluta*: practical implementations across different world regions. *J Pest Sci*. 2022;1–23. <https://doi.org/10.1007/s10340-021-01442-8>
33. Liu N. Insecticide resistance in mosquitoes: impact, mechanisms, and research directions. *Annu Rev Entomol*. 2015;60:537–59. <https://doi.org/10.1146/annurev-ento-010814-020828> PMID: 25564745
34. Wang J-Y, Fan N-N, Yuan Y, Bass C, Siemann E, Ji X-Y, et al. Plant defense metabolites influence the interaction between an insect herbivore and an entomovirus. *Curr Biol*. 2024;34(24):5758–5768.e5. <https://doi.org/10.1016/j.cub.2024.10.068> PMID: 39577425
35. Felton GW, Summers CB. Antioxidant systems in insects. *Arch Insect Biochem Physiol*. 1995;29(2):187–97. <https://doi.org/10.1002/arch.940290208> PMID: 7606043
36. Zhu-Salzman K, Zeng R. Insect response to plant defensive protease inhibitors. *Annu Rev Entomol*. 2015;60:233–52. <https://doi.org/10.1146/annurev-ento-010814-020816> PMID: 25341101
37. Sule RO, Condon L, Gomes AV. A Common Feature of Pesticides: Oxidative Stress-The Role of Oxidative Stress in Pesticide-Induced Toxicity. *Oxid Med Cell Longev*. 2022;2022:5563759. <https://doi.org/10.1155/2022/5563759> PMID: 35096268

38. Zhouzhi L, Huijuan S, Qiaogen J, Baozhong J. A study on the activities of endogenous enzymes of protective system in some insects. *Acta Entomologica Sinica*. 1995;37(4):399–403.
39. Ono M, Swanson JJ, Field LM, Devonshire AL, Siegfried BD. Amplification and methylation of an esterase gene associated with insecticide-resistance in greenbugs, *Schizaphis graminum* (Rondani) (Homoptera: Aphididae). *Insect Biochem Mol Biol*. 1999;29(12):1065–73. [https://doi.org/10.1016/s0965-1748\(99\)00082-x](https://doi.org/10.1016/s0965-1748(99)00082-x) PMID: [10612041](#)
40. Chen M, Han Z, Qiao X, Qu M. Mutations in acetylcholinesterase genes of *Rhopalosiphum padi* resistant to organophosphate and carbamate insecticides. *Genome*. 2007;50(2):172–9. <https://doi.org/10.1139/g07-021> PMID: [17546082](#)
41. Zhou C, Yang H, Wang Z, Long G-Y, Jin D-C. Protective and Detoxifying Enzyme Activity and ABCG Subfamily Gene Expression in *Sogatella furcifera* Under Insecticide Stress. *Front Physiol*. 2019;9:1890. <https://doi.org/10.3389/fphys.2018.01890> PMID: [30670985](#)
42. Shan Y-X, Zhu Y, Li J-J, Wang N-M, Yu Q-T, Xue C-B. Acute lethal and sublethal effects of four insecticides on the lacewing (*Chrysoperla sinica* Tjeder). *Chemosphere*. 2020;250:126321. <https://doi.org/10.1016/j.chemosphere.2020.126321> PMID: [32135440](#)
43. Martelli F, Zhongyuan Z, Wang J, Wong C-O, Karagas NE, Roessner U, et al. Low doses of the neonicotinoid insecticide imidacloprid induce ROS triggering neurological and metabolic impairments in *Drosophila*. *Proc Natl Acad Sci U S A*. 2020;117(41):25840–50. <https://doi.org/10.1073/pnas.2011828117> PMID: [32989137](#)
44. Juan CA, Pérez de la Lastra JM, Plou FJ, Pérez-Lebeña E. The Chemistry of Reactive Oxygen Species (ROS) Revisited: Outlining Their Role in Biological Macromolecules (DNA, Lipids and Proteins) and Induced Pathologies. *Int J Mol Sci*. 2021;22(9):4642. <https://doi.org/10.3390/ijms22094642> PMID: [33924958](#)
45. Cao S, Xiao H, Li X, Zhu J, Gao J, Wang L, et al. AMPK-PINK1/Parkin Mediated Mitophagy Is Necessary for Alleviating Oxidative Stress-Induced Intestinal Epithelial Barrier Damage and Mitochondrial Energy Metabolism Dysfunction in IPEC-J2. *Antioxidants (Basel)*. 2021;10(12):2010. <https://doi.org/10.3390/antiox10122010> PMID: [34943113](#)
46. Pinthus JH, Whelan KF, Gallino D, Lu J-P, Rothschild N. Metabolic features of clear-cell renal cell carcinoma: mechanisms and clinical implications. *Can Urol Assoc J*. 2011;5(4):274–82. <https://doi.org/10.5489/cuaj.10196> PMID: [21801687](#)
47. Fontecilla-Camps JC. Primordial bioenergy sources: The two facets of adenosine triphosphate. *J Inorg Biochem*. 2021;216:111347. <https://doi.org/10.1016/j.jinorgbio.2020.111347> PMID: [33450675](#)
48. Zhang C-X, Wang Z-J, Li J-J, Wang N-M, Xue C-B. Sublethal effects of tolfenpyrad on the development, reproduction, and predatory ability of *Chrysoperla sinica*. *Ecotoxicol Environ Saf*. 2022;236:113482. <https://doi.org/10.1016/j.ecoenv.2022.113482> PMID: [35367884](#)
